# Supplementary material for: Ampere-hour-scale soft-package potassium-ion hybrid capacitors enabling 6-minute fast-charging
Source: Springer Nature journal article supplement (doi:10.1038/s41467-023-42108-6), 2023-10-12
Supplement: MOESM1 [file 41467_2023_42108_MOESM1_ESM.pdf]

## Supplementary Information

### **Ampere-hour-scale soft-package potassium-ion hybrid capacitors enabling 6-minute fast-charging**

Huanxin Li,<sup>1, 2, 3, 4#</sup> Yi Gong,<sup>5, 6#</sup> Haihui Zhou,<sup>1\*</sup> Jing Li,<sup>7</sup> Kai Yang,<sup>6</sup> Boyang Mao,<sup>2</sup> Jincan Zhang,<sup>2</sup> Yan Shi,<sup>8</sup> Jinhai Deng,<sup>9</sup> Mingxuan Mao,<sup>10</sup> Zhongyuan Huang,<sup>1</sup> Shuqiang Jiao,<sup>11\*</sup>  
Yafei Kuang,<sup>1</sup> Yunlong Zhao,<sup>5\*</sup> Shenglian Luo<sup>1\*</sup>

## Supplementary Note 1: Calculating capacitive vs diffusive current.

To verify the contribution of pseudocapacitive behaviour, further analysis was conducted as follows. The relationship between the peak current density ( $i$ ) and the sweep rate ( $v$ ) could be described as the following equations<sup>1</sup>:

$$i = av^b \quad (1)$$

$$\log(i) = b * \log(v) + \log(a) \quad (2)$$

where the  $b$  value could be determined by the slope of linear fitted  $\log(i)$ - $\log(v)$  curves.

Typically, when the  $b$  value is approaching 0.5, it indicates that the intercalation of potassium ion is mainly determined by the diffusion process, while the  $b$  value gets close to 1.0, the potassium storage is dominated by the pseudocapacitor behaviours, such as surface-controlled capacitive process or intercalation without phase transition.

The quantitative calculation of capacitive contribution ratio during the potassium-ion storage process was conducted by the following equation<sup>2</sup>:

$$i(V) = k_1 v^{1/2} + k_2 v \quad (3)$$

$$i/v^{1/2} = k_1 + k_2 v^{1/2} \quad (4)$$

where  $i$  (V) is the current density at a certain potential,  $v$  is the scan rate,  $k_1$  and  $k_2$  are constants at a certain potential. The values of  $k_1$  and  $k_2$  can be calculated through Eq. (3) and (4), which correspond to the slope and intercept of the fitted lines of  $v^{1/2}$  versus  $i/v^{1/2}$  plots.

## Supplementary Figures

### CV tests for the capacitive behaviours

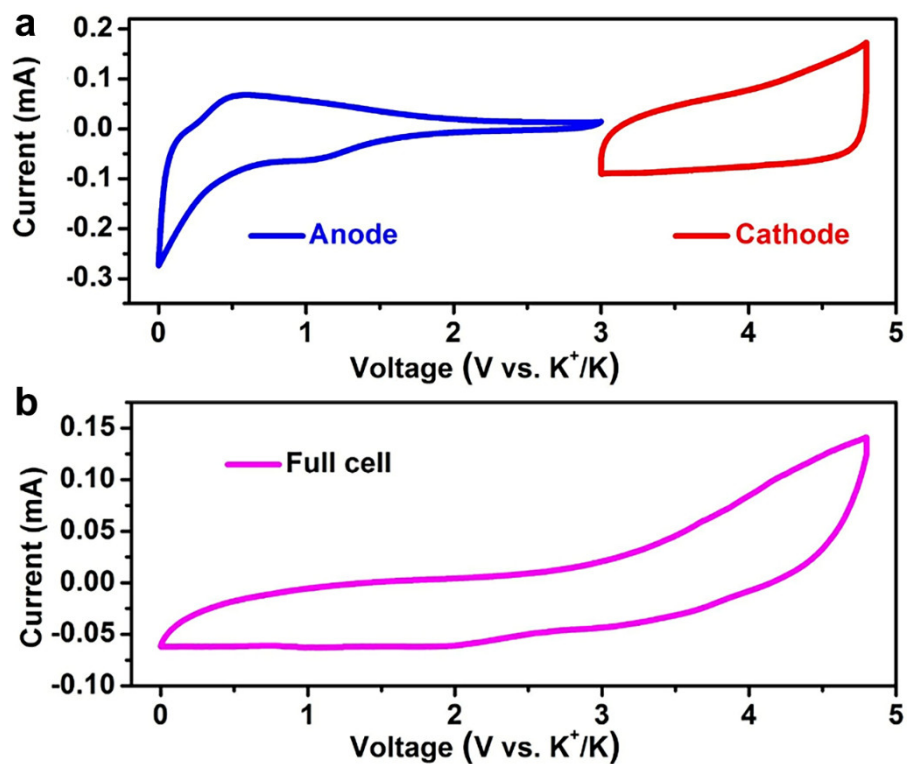

**Supplementary Fig. 1.** **a** Schematic of the mechanism for potassium storage in PIBHCD. **b** The relative shapes of CV curves for full cell.

## Morphologies of electrodes (Supplementary Fig. 2-7)

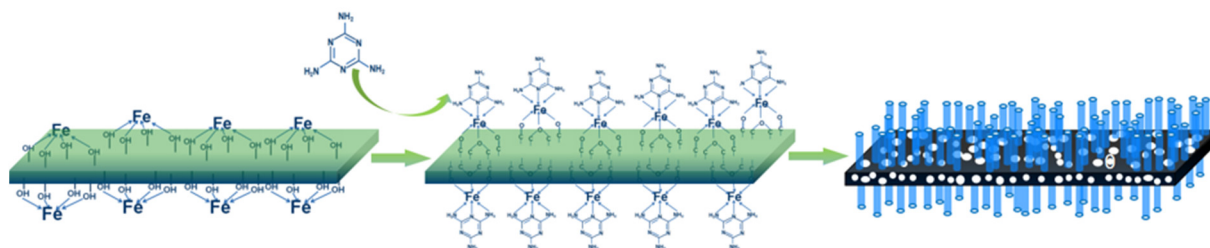

**Supplementary Fig. 2** The schematic illustration of the process of preparing the N-CNTs@MC.

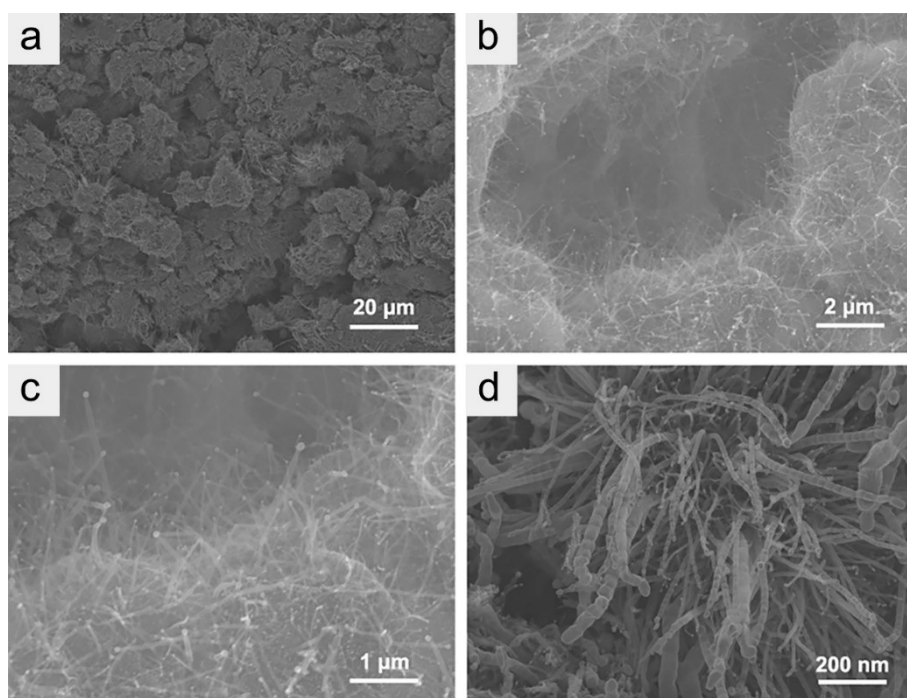

**Supplementary Fig. 3.** SEM images of Fe<sub>2</sub>O<sub>3</sub>-N-CNTs@MC at different magnification, scale bar: **a** 20  $\mu\text{m}$ . **b** 2  $\mu\text{m}$ . **c** 1  $\mu\text{m}$ . **d** 200 nm.

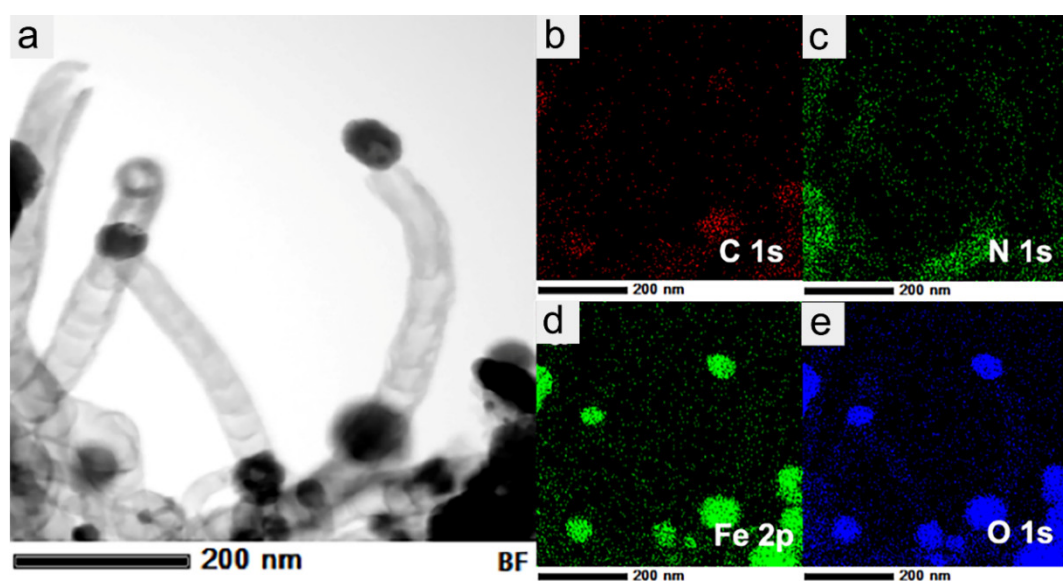

**Supplementary Fig. 4.** **a** Typical TEM images of Fe<sub>2</sub>O<sub>3</sub>-N-CNTs@MC and corresponding mapping images for **b** C, **c** N, **d** Fe and **e** O elements.

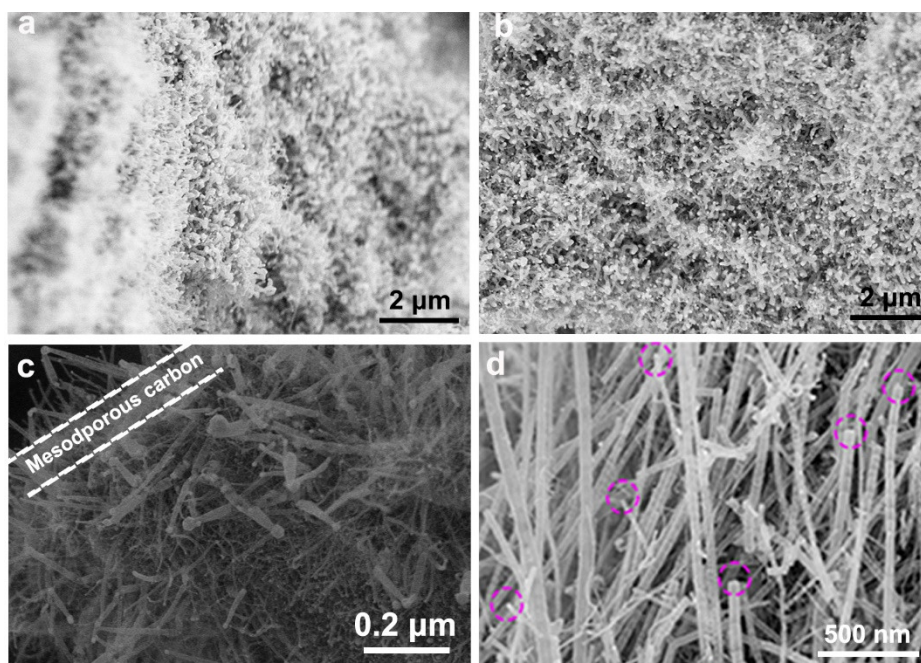

**Supplementary Fig. 5.** SEM images of N-CNTs@MC after acid wash and high-temperature heat treatment at different magnification, scale bar: **a** 2 μm, **b** 2 μm, **c**. 0.2 μm, **d** 500 nm (pink circle: open end of the CNTs).

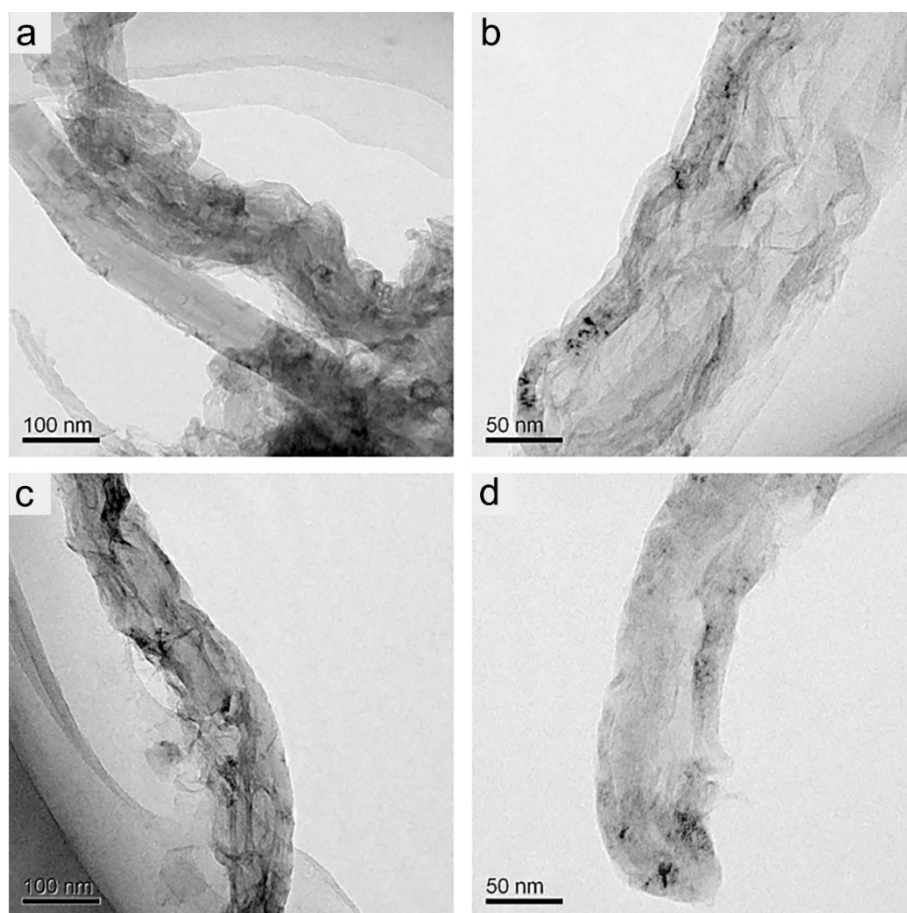

**Supplementary Fig. 6.** TEM images of the carbon nanotubes in N-CNTs@MC after acid washing: **a** and **b** depict N-CNTs at various locations on the MC, while **c** and **d** show individual N-CNTs in distinct regions.



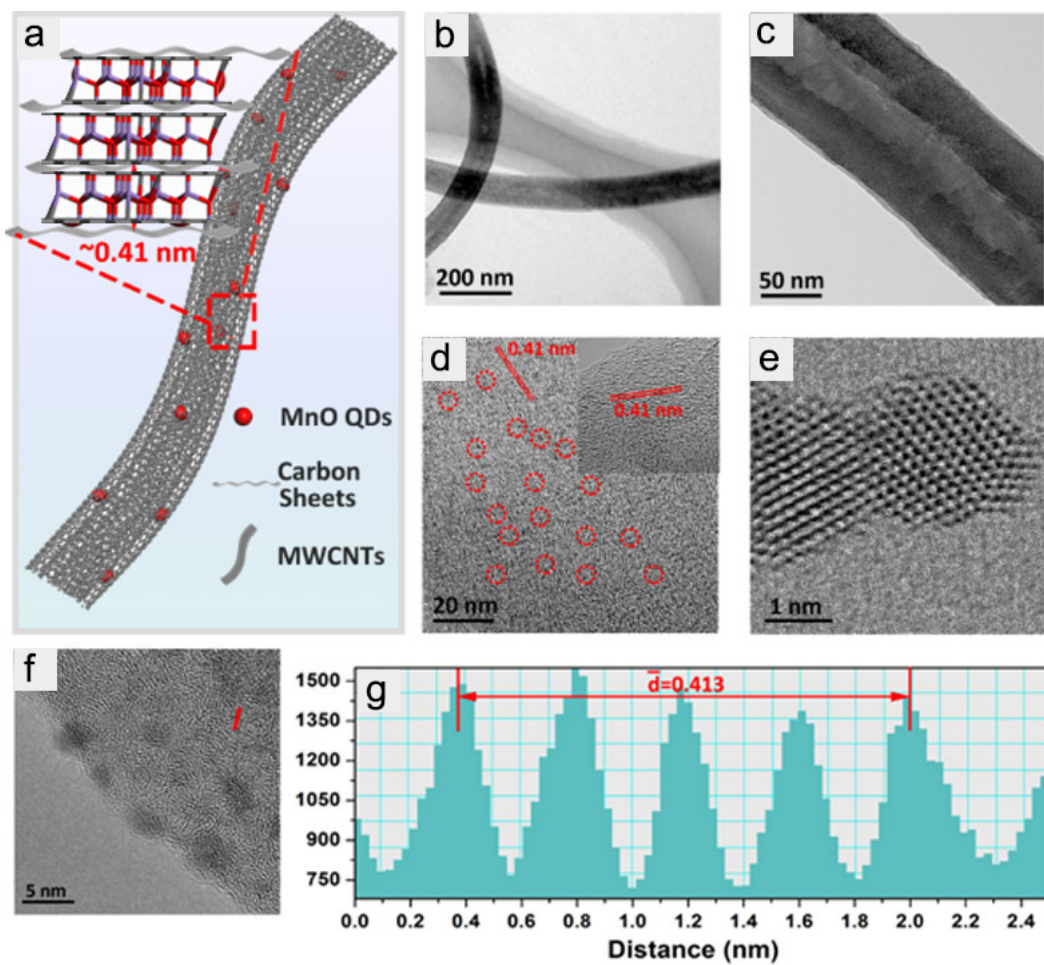

**Supplementary Fig. 7.** **a** Schematic diagram, **b** TEM, and **c** enlarged TEM images of MnO@CNTs; **d** High resolution TEM image on the wall of MnO@CNTs; **e** Atomic image of the MnO quantum dots; **f** TEM image of MnO@CNTs with clear diffraction fringes of carbon layer and **g** corresponding carbon layer spacing.

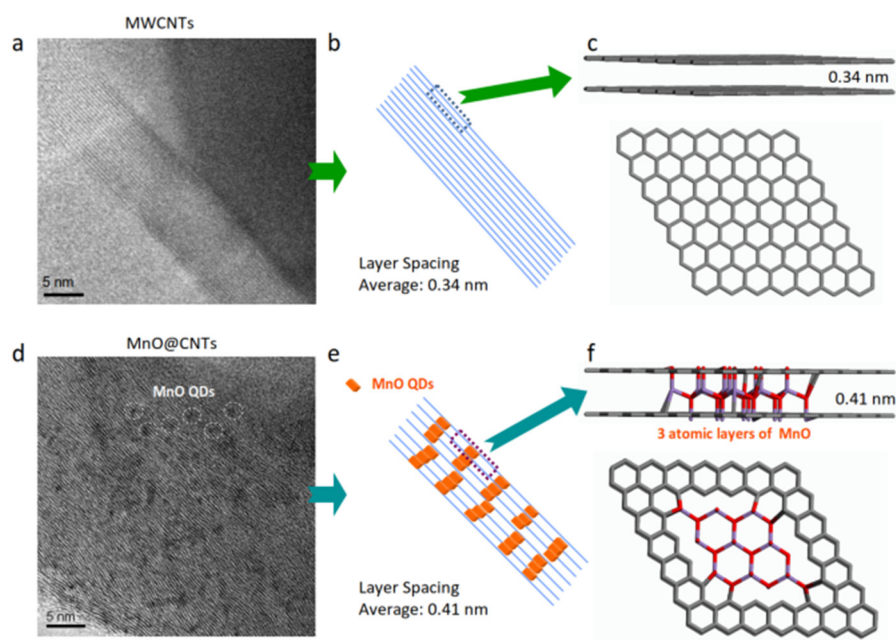

**Supplementary Fig. 8.** The illustration of the comparison between MWCNTs and MnO@CNTs. **a** The TEM image of the MWCNTs, **b** The schematic illustration of the layer spacing of the MWCNTs, **c** The atomic structure of the MWCNTs, **d** The TEM image of the MnO@CNTs, **e** The schematic illustration of the structure of the MnO@CNTs, **f** The atomic structure of the MnO@CNTs.

## Compositions and structures (Supplementary Fig. 9-16)

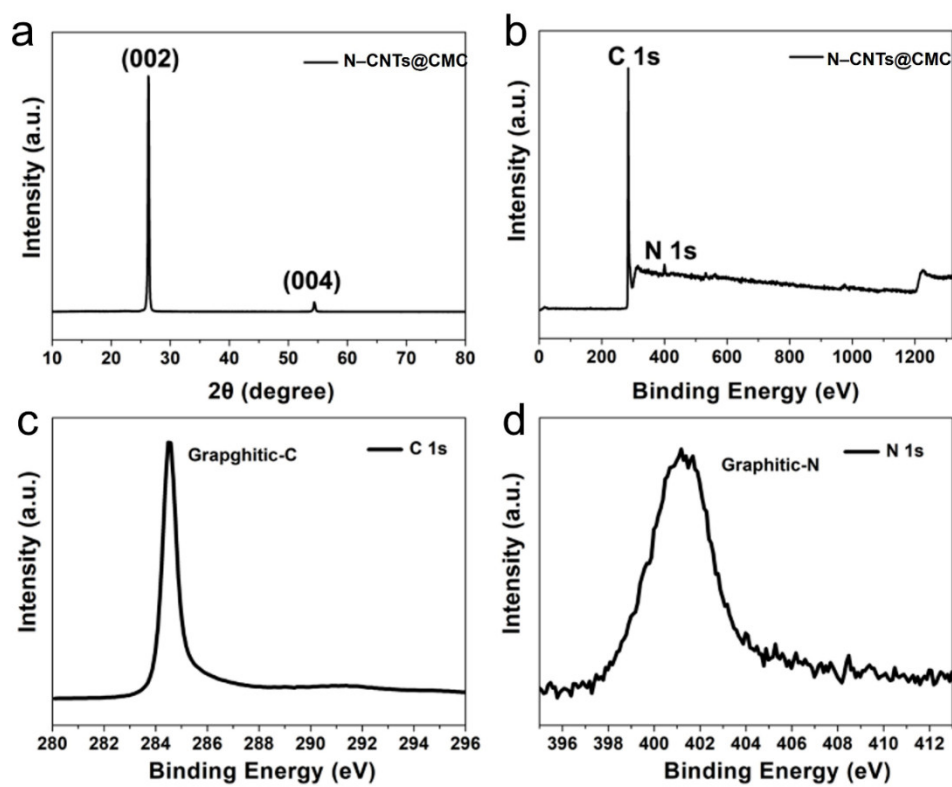

**Supplementary Fig. 9.** **a** XRD pattern of N-CNTs@CMC; **b** XPS survey of N-CNTs@CMC; **c** XPS high resolution peaks of C 1s and **d** N 1s in N-CNTs@CMC.

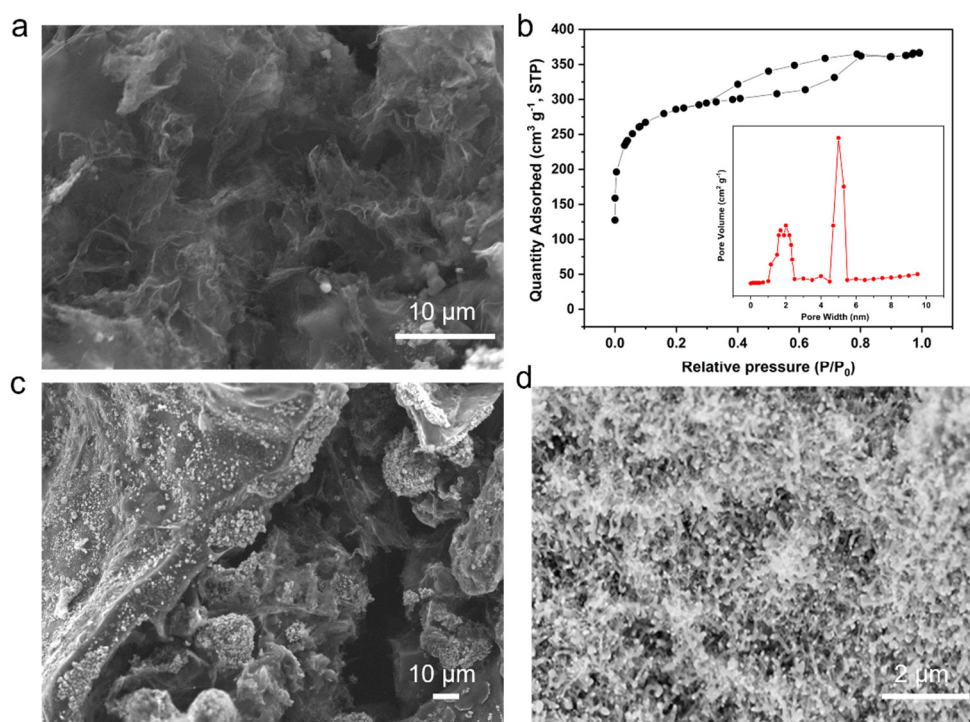

**Supplementary Fig. 10.** **a** The SEM of the MC; **b** the Nitrogen adsorption-desorption isotherms and pores size distribution of the MC; **c** The SEM of  $\text{Fe}_2\text{O}_3$ @MC; **d** the SEM of the N-CNTs@MC

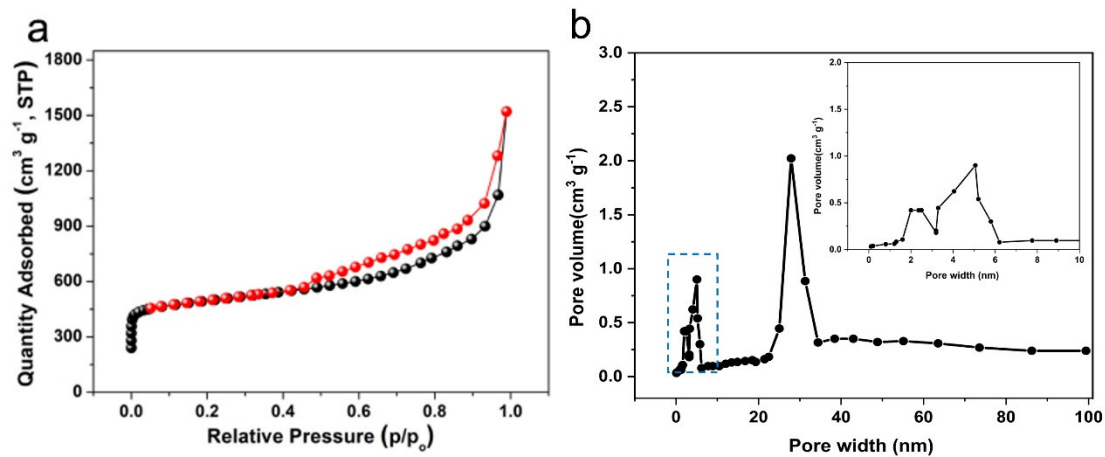

**Supplementary Fig. 11.** **a** Nitrogen adsorption-desorption isotherms and **b** pore size distributions of N-CNTs@MC.

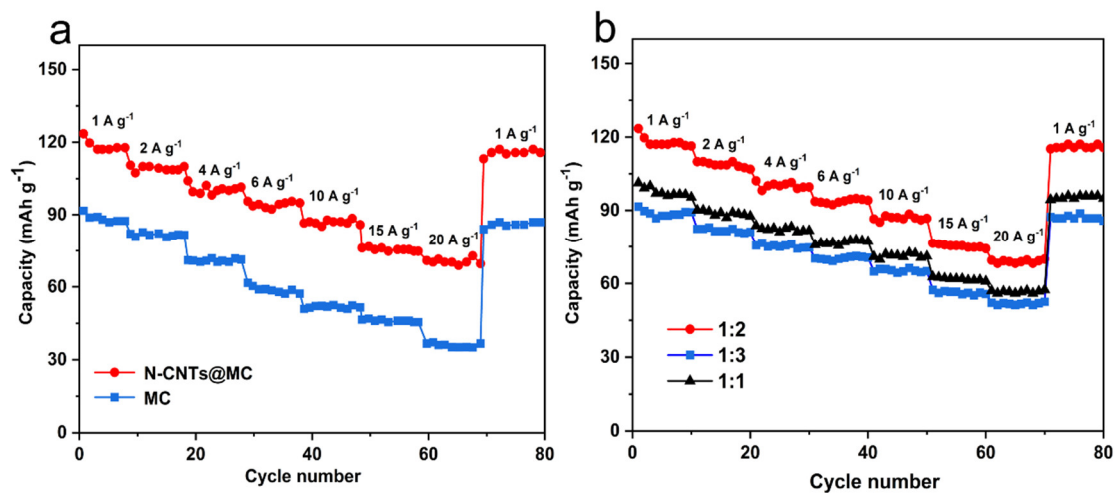

**Supplementary Fig. 12.** **a** Rate performance of the MC and N-CNTs@MC samples, **b** The comparison of the rate performance of N-CNTs@MC prepared with different ratios of MC precursor and melamine.

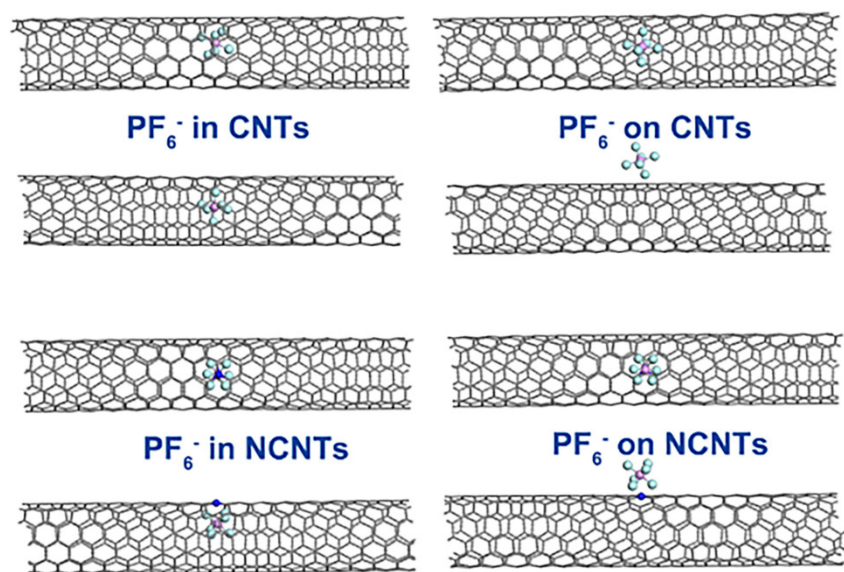

**Supplementary Fig. 13.** The optimized structures of adsorbed PF<sub>6</sub><sup>-</sup> ions on CNT and N-CNT.

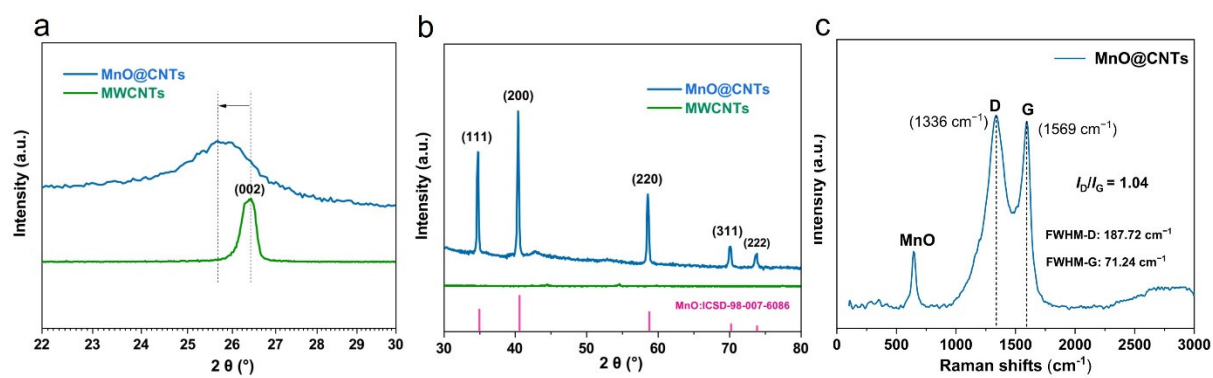

**Supplementary Fig. 14.** XRD patterns of MnO@CNTs and CNTs: **a** from  $22^\circ$  to  $30^\circ$ , **b** from  $30^\circ$  to  $80^\circ$ . **c** Raman spectra of MnO@CNTs.



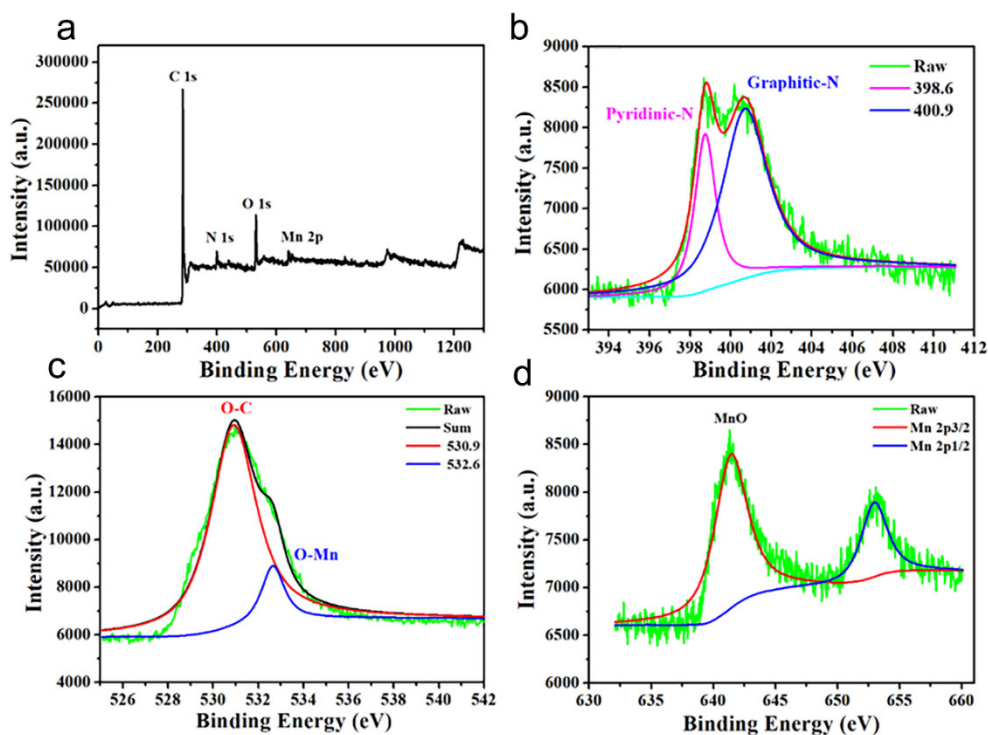

**Supplementary Fig. 15.** XPS survey of MnO@CNTs: **a** XPS full spectra, and high resolution XPS spectra with fittings of **b** N 1s, **c**. O 1s, **d** Mn 2p.

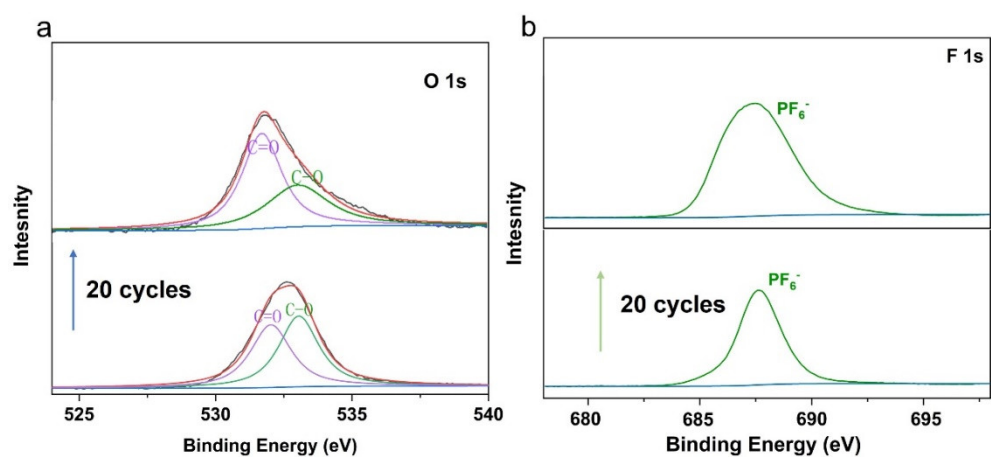

**Supplementary Fig. 16.** The XPS analysis of the cathode electrode before and after 20cycles:

**a.** O 1s curves, **b** F 1s curves of cathode before and after 20 cycles.

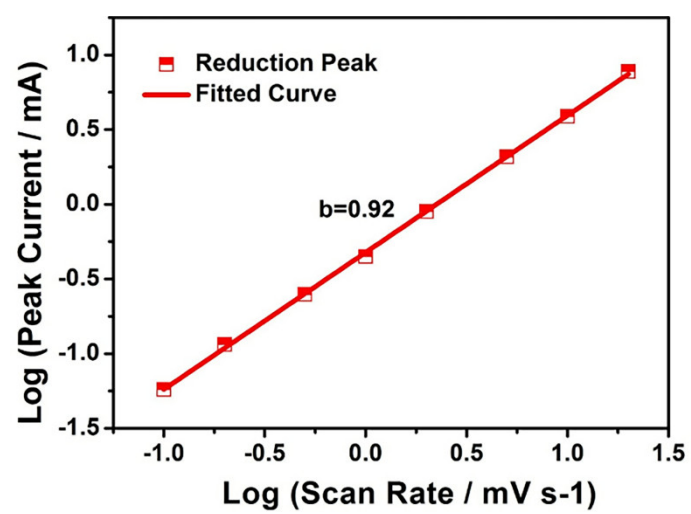

**Supplementary Fig. 17.** Log(i)–log(v) curves for b-value determination

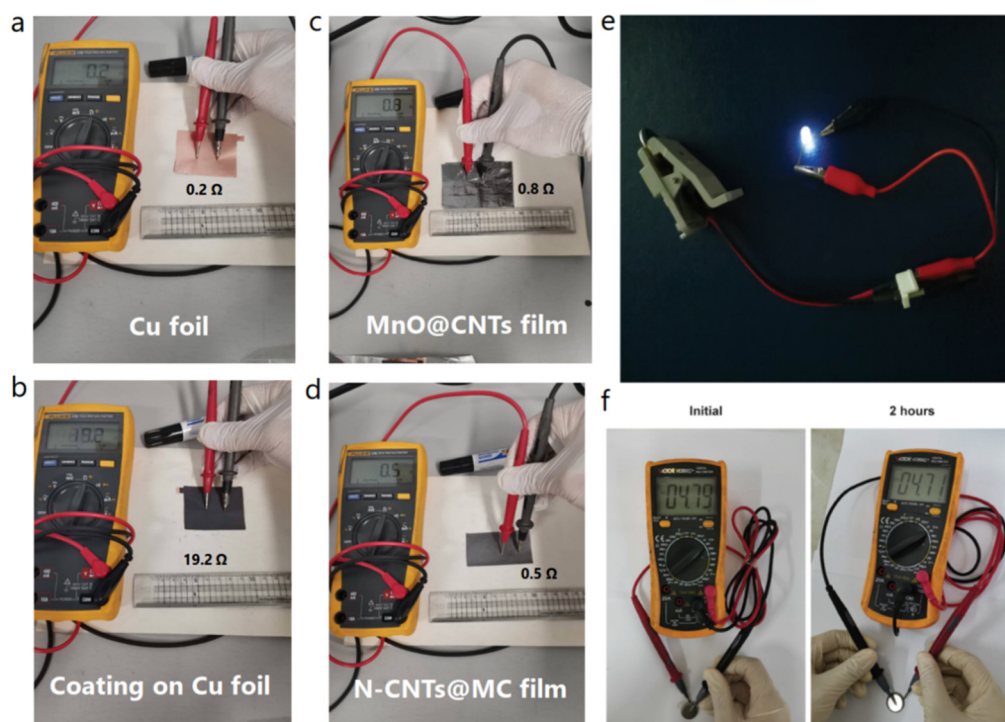

**Supplementary Fig. 18.** Comparison of the conductivity of **a** Cu foil, **b** the anode material coated on Cu foil, **c** N-CNTs@MC film and **d** MnO@CNTs film. **e** the photograph of the coin cell lighting a LED light, **f** the self-discharge test of the coin cell

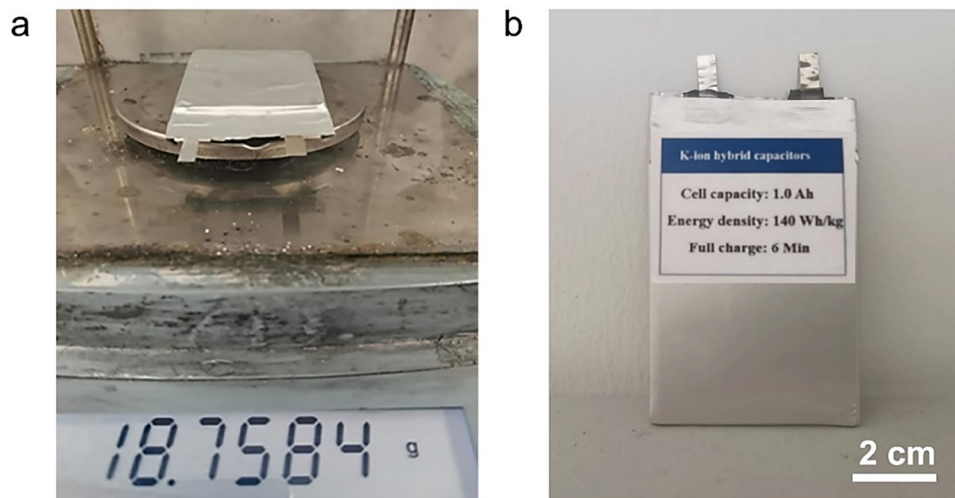

**Supplementary Fig. 19. a** The weight of ~1Ah PIHC. **b** The picture of the prepared 1Ah PIHC

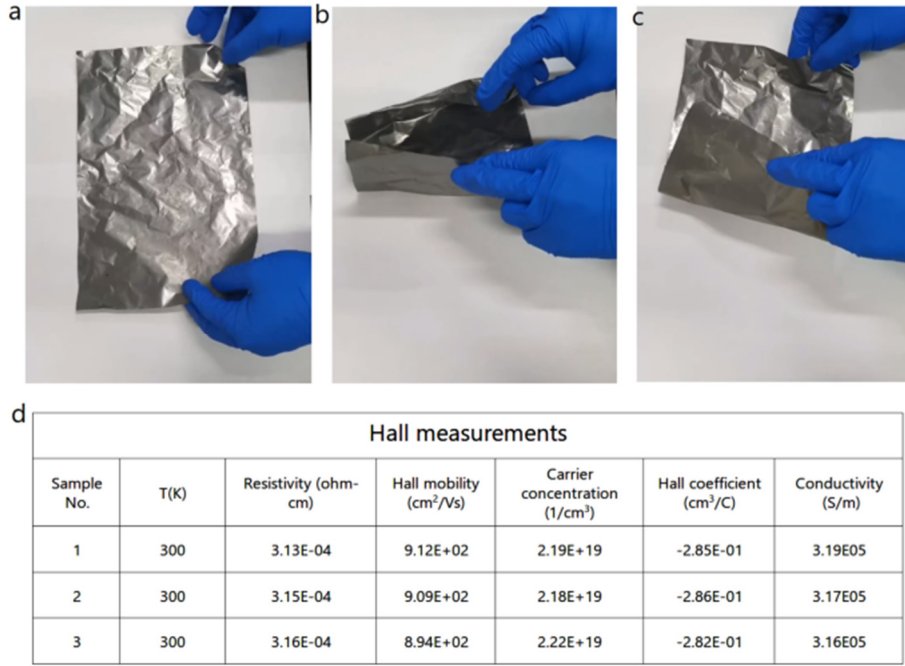

**Supplementary Fig. 20.** The photographs of **a** the N-CNTs@MC film, **b** the folded N-CNTs@MC film, **c** the N-CNTs@MC film after continuous folding. **d** The data of the Hall measurement for the N-CNTs@MC film

## Supplementary Tables

**Supplementary Table 1** Optimized parameters of the soft-packaged PIHC with the capacity of ~1Ah

| Parameters of winded soft-package PHICs |         |        |           |                      |                            |                        |
|-----------------------------------------|---------|--------|-----------|----------------------|----------------------------|------------------------|
|                                         | Cathode | Anode  | Separator | S (cm <sup>2</sup> ) | Total V (cm <sup>3</sup> ) | Volume Density (Wh/L)  |
| Area mass (mg cm <sup>-2</sup> )        | 30      | 10     | 1.7       | Single               | 7.5                        | 283.2                  |
|                                         |         |        |           | 24.8                 |                            |                        |
| Thickness (μm)                          | 150     | 40     | 12.0      | Stack                | Electrolyte (mg)           | Shell and Tags (mg)    |
|                                         |         |        |           | 10                   | 4474.5                     | 3186.4                 |
| Density (g cm <sup>-3</sup> )           | ~20     | ~2.5   | ~1.42     | Core mass            | Total mass (mg)            | Energy density (Wh/Kg) |
| Mass (mg)                               | 7425.0  | 2722.5 | 950.0     | 11097.5              | 18758.4                    | 140.0                  |

**Supplementary Table 2** Free energies from DFT calculations for  $\text{PF}_6^-$ , CNTs, NCNTs,  $\text{PF}_6^-$ @CNTs,  $\text{PF}_6^-$ @NCNTs,  $\text{K}^+$ ,  $\text{MnO@G}$ , and  $\text{K}^+$  on G and  $\text{K}^+$  on  $\text{MnO@G}$

| Calculation of adsorption energies (eV) |                          |                                        |                                                              |
|-----------------------------------------|--------------------------|----------------------------------------|--------------------------------------------------------------|
| $\text{PF}_6^-$ on SCNT                 |                          |                                        |                                                              |
| $E_{\text{PF}_6^-}$ (eV)                | $E_{\text{CNTs}}$ (eV)   | $E_{\text{PF}_6^-@\text{CNTs}}$ (eV)   | $\Delta E_{\text{ads}} (\text{CNTs} - \text{PF}_6^-)$ (eV)   |
| -30.92                                  | -3103.04                 | -3136.15                               | -2.19                                                        |
| $\text{PF}_6^-$ on N-CNT                |                          |                                        |                                                              |
| $E_{\text{PF}_6^-}$ (eV)                | $E_{\text{N-CNTs}}$ (eV) | $E_{\text{PF}_6^-@\text{N-CNTs}}$ (eV) | $\Delta E_{\text{ads}} (\text{N-CNTs} - \text{PF}_6^-)$ (eV) |
| -30.92                                  | -3107.30                 | 3148.42                                | -10.21                                                       |
| $\text{K}^+$ on G                       |                          |                                        |                                                              |
| $E_{\text{K}^+}$ (eV)                   | $E_{\text{G}}$ (eV)      | $E_{\text{K}^+@\text{G}}$ (eV)         | $\Delta E_{\text{ads}} (\text{G} - \text{K}^+)$ (eV)         |
| -2.36                                   | -526.32                  | -529.94                                | -1.26                                                        |
| $\text{K}^+$ on $\text{MnO@G}$          |                          |                                        |                                                              |
| $E_{\text{K}^+}$ (eV)                   | $E_{\text{G}}$ (eV)      | $E_{\text{K}^+@\text{MnO@G}}$ (eV)     | $\Delta E_{\text{ads}} (\text{MnO@G} - \text{K}^+)$ (eV)     |
| -2.36                                   | -690.95                  | -698.08                                | -4.76                                                        |



**Supplementary Table 3. Comparison with the recently-reported representative PIHC**

| <b>Cathode//<br/>Anode<sup>[Ref.]</sup></b>                                           | <b>Voltage (V)</b> | <b>Energy density (Wh kg<sup>-1</sup>)</b>                            | <b>Power density (W kg<sup>-1</sup>)</b>                              | <b>Type of devices</b> |
|---------------------------------------------------------------------------------------|--------------------|-----------------------------------------------------------------------|-----------------------------------------------------------------------|------------------------|
| <b>N-CNTs@MC//MnO@CNTs</b><br>[Our work]                                              | 0.8-4.8            | <b>140</b> Wh kg <sup>-1</sup> (based on the whole weight of PIBHCD); | 1400 W kg <sup>-1</sup><br>(10 C, fully charged within <b>6</b> mins) | <b>1Ah Pouch cell</b>  |
| FCDAC//CNS <sub>3</sub>                                                               | 0-4.2              | 40 (based on the weight of the electrode)                             | 21000                                                                 | coin cell              |
| ANHCS//NHCS <sub>4</sub>                                                              | 0.01-4             | 19.1                                                                  | 8203                                                                  | coin cell              |
| 3DNFC//3DNFAC <sup>5</sup>                                                            | 1.5-4.2            | 76.4                                                                  | 21000                                                                 | coin cell              |
| WS <sub>2</sub> @NCN//NCHS <sup>6</sup>                                               | 0.6-4.2            | 103.4                                                                 | 235                                                                   | coin cell              |
| AC//Ca <sub>0.5</sub> Ti <sub>2</sub> (PO <sub>4</sub> ) <sub>3</sub> @C <sup>7</sup> | 1-4                | 34                                                                    | 5144                                                                  | coin cell              |
| U-Co <sub>2</sub> P@rGO-14//AC <sup>8</sup>                                           | 1-4                | 87                                                                    | 4260                                                                  | coin cell              |
| AC//Sn <sup>9</sup>                                                                   | 1-4                | 120                                                                   | 2850                                                                  | 2-layer pouch cell     |
| AC//SC <sup>10</sup>                                                                  | 0-4                | 120                                                                   | 599                                                                   | coin cell              |
| KTO//NGC <sup>11</sup>                                                                | 0-3.5              | 58.2                                                                  | 7200                                                                  | coin cell              |
| WPCS//WPCS <sub>12</sub>                                                              | 0-4.5              | 44                                                                    | 15400                                                                 | coin cell              |
| AC//MoSe <sub>2</sub> /C-700 <sup>13</sup>                                            | 1-4                | 106                                                                   | 588                                                                   | coin cell              |
| AC//NMCP@rGO <sup>14</sup>                                                            | 0.01-4.2           | 63.6                                                                  | 19091                                                                 | coin cell              |
| AC//NbSe <sub>2</sub> /NSeCNFs <sup>15</sup>                                          | 0.01-4             | 145                                                                   | /                                                                     | coin cell              |

## Supplementary References

1. Augustyn V, *et al.* High-rate electrochemical energy storage through Li<sup>+</sup> intercalation pseudocapacitance. *Nature materials* **12**, 518-522 (2013).
2. Kim H-S, *et al.* Oxygen vacancies enhance pseudocapacitive charge storage properties of MoO<sub>3</sub>-x. *Nature materials* **16**, 454-460 (2017).
3. Chen J, *et al.* Disordered, large interlayer spacing, and oxygen-rich carbon nanosheets for potassium ion hybrid capacitor. *Advanced Energy Materials* **9**, 1803894 (2019).
4. Qiu D, *et al.* Kinetics enhanced nitrogen-doped hierarchical porous hollow carbon spheres boosting advanced potassium-ion hybrid capacitors. *Advanced Functional Materials* **29**, 1903496 (2019).
5. Yang B, *et al.* 3D nitrogen-doped framework carbon for high-performance potassium ion hybrid capacitor. *Energy Storage Materials* **23**, 522-529 (2019).
6. Li Y, *et al.* Enhanced cathode and anode compatibility for boosting both energy and power densities of Na/K-ion hybrid capacitors. *Matter* **1**, 893-910 (2019).
7. Zhang Z, *et al.* Fast potassium storage in hierarchical CaO. 5Ti<sub>2</sub> (PO<sub>4</sub>)<sub>3</sub>@ C microspheres enabling high-performance potassium-ion capacitors. *Advanced Functional Materials* **28**, 1802684 (2018).
8. Wang Y, *et al.* Ultrafine Co<sub>2</sub>P nanorods wrapped by graphene enable a long cycle life performance for a hybrid potassium-ion capacitor. *Nanoscale Horizons* **4**, 1394-1401 (2019).
9. Lang J, Li J, Ou X, Zhang F, Shin K, Tang Y. A flexible potassium-ion hybrid capacitor with superior rate performance and long cycling life. *ACS applied materials & interfaces* **12**, 2424-2431 (2019).
10. Fan L, Lin K, Wang J, Ma R, Lu B. A nonaqueous potassium-based battery-supercapacitor hybrid device. *Advanced materials* **30**, 1800804 (2018).
11. Dong S, Li Z, Xing Z, Wu X, Ji X, Zhang X. Novel potassium-ion hybrid capacitor based on an anode of K<sub>2</sub>Ti<sub>6</sub>O<sub>13</sub> microscavolds. *ACS applied materials & interfaces* **10**, 15542-15547 (2018).
12. Cui Y, *et al.* Bioinspired mineralization under freezing conditions: an approach to fabricate porous carbons with complicated architecture and superior K<sup>+</sup> storage performance. *Acs Nano* **13**, 11582-11592 (2019).
13. Shen Q, Jiang P, He H, Chen C, Liu Y, Zhang M. Encapsulation of MoSe<sub>2</sub> in carbon fibers as anodes for potassium ion batteries and nonaqueous battery-supercapacitor hybrid devices. *Nanoscale* **11**, 13511-13520 (2019).
14. Ruan J, *et al.* Rational construction of nitrogen-doped hierarchical dual-carbon for advanced potassium-ion hybrid capacitors. *Advanced Energy Materials* **10**, 1904045 (2020).
15. Chen M, *et al.* An Ultrastable Nonaqueous Potassium-Ion Hybrid Capacitor. *Advanced Functional Materials* **30**, 2004247 (2020).
